# Supplementary material for: Cryoballoon pulmonary vein isolation-mediated rise of sinus rate in patients with paroxysmal atrial fibrillation
Source: Springer Nature journal article supplement (doi:10.1007/s00392-020-01659-0), 2020-05-13
Supplement: MOESM1 [file 17978942]

**Online Material to:**

**Cryoballoon pulmonary vein isolation-mediated rise of sinus rate in patients with paroxysmal atrial fibrillation**

Lara Wagner, BA<sup>a,†</sup>; Fabrice F. Darche, MD<sup>a,†</sup>; Dierk Thomas, MD<sup>a,b</sup>; Patrick Lugenbiel, MD<sup>a</sup>; Panagiotis Xynogalos, MD<sup>a</sup>; Svenja Seide, PhD<sup>c</sup>; Eberhard P. Scholz, MD<sup>a</sup>; Hugo A. Katus, MD<sup>a,b</sup>; and Patrick A. Schweizer, MD<sup>a,b\*</sup>

<sup>a</sup>Department of Cardiology, Medical University Hospital Heidelberg, INF 410, D-69120 Heidelberg, Germany.

<sup>b</sup>DZHK (German Centre for Cardiovascular Research), partner site Heidelberg/Mannheim, University of Heidelberg, Germany

<sup>c</sup>Institute of Medical Biometry and Informatics, University of Heidelberg, INF 130.3, D-69120 Heidelberg, Germany.

\* Corresponding author

† Authors contributed equally to this work

**Address for correspondence:**

Patrick A. Schweizer, MD

Department of Cardiology, University of Heidelberg, INF 410, D-69120 Heidelberg, Germany

Tel. +49 6221-5639732

Fax +49 6221-565514

E-mail: [patrick.schweizer@med.uni-heidelberg.de](mailto:patrick.schweizer@med.uni-heidelberg.de)

**Journal:** Clinical Research in Cardiology

**Online Resource 1:** Influence of antiarrhythmic drug (AAD) therapy on cryo-PVI-mediated heart rate modulation

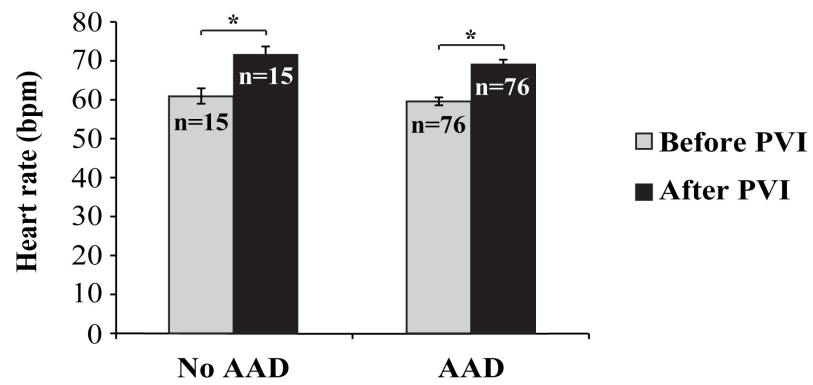

**Online Resource 2:** Kaplan-Meier curves of freedom from atrial fibrillation. Heart rate analysis by pre- / post-interventional continuous ECG monitoring (n = 91 patients)

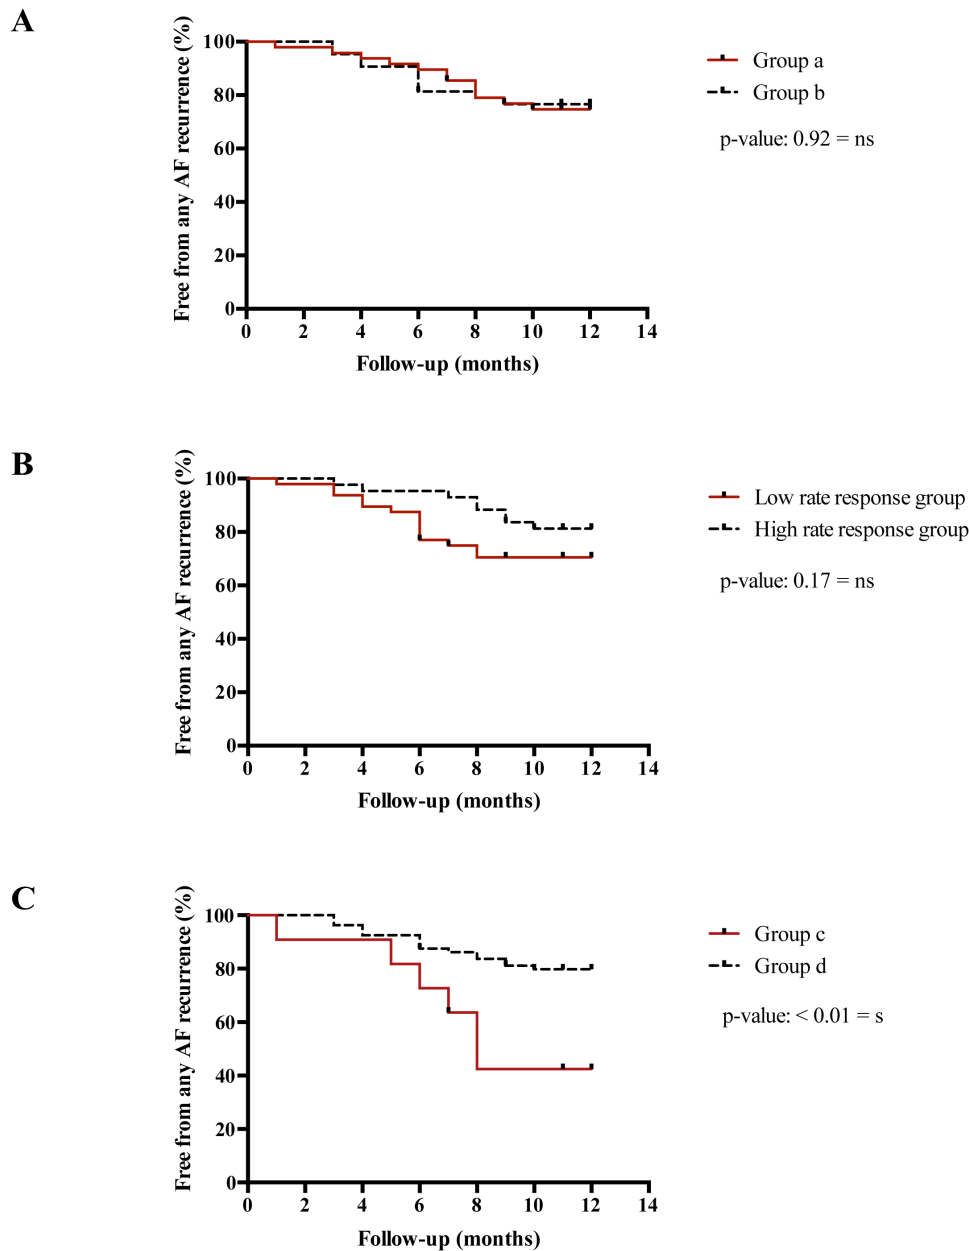

**A:** Kaplan-Meier curve of freedom from atrial fibrillation in patients with pre-interventional sinus bradycardia (< 60/min., group a) and normal sinus rate ( $\geq$  60/min., group b).

**B:** Kaplan-Meier curve of freedom from atrial fibrillation in the high rate response group compared to the low rate response group.

**C:** Kaplan-Meier curve of freedom from atrial fibrillation in patients with post-interventional sinus bradycardia (< 60/min., group c) and normal sinus rate ( $\geq$  60/min., group d).

AF: atrial fibrillation, s: significant, ns: not significant, n: number of analyzed patients.

**Online Resource 3:** Kaplan-Meier curves of freedom from atrial fibrillation. Heart rate analysis by pre- / post-interventional 24-hour Holter recording (n = 75 patients)

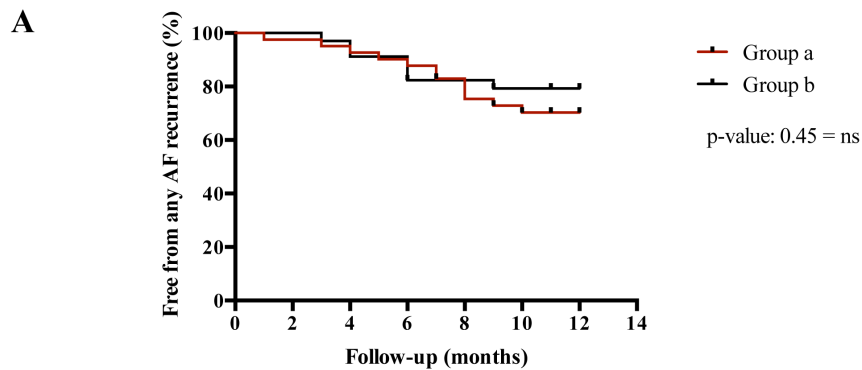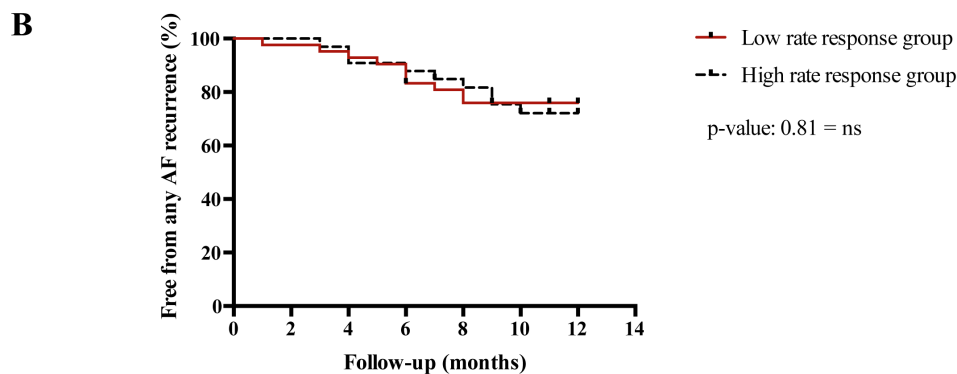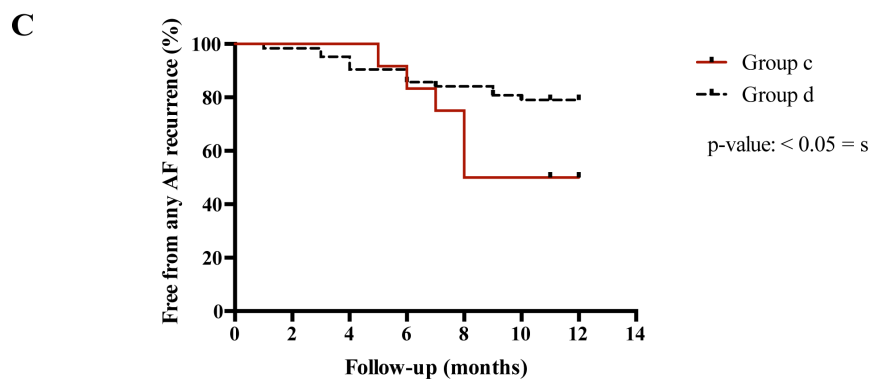

**A:** Kaplan-Meier curve of freedom from atrial fibrillation in patients with pre-interventional sinus bradycardia (< 60/min., group a) and normal sinus rate ( $\geq$  60/min., group b).

**B:** Kaplan-Meier curve of freedom from atrial fibrillation in the high rate response group compared to the low rate response group.

**C:** Kaplan-Meier curve of freedom from atrial fibrillation in patients with postinterventional sinus bradycardia (< 60/min., group c) and normal sinus rate ( $\geq$  60/min., group d).

AF: atrial fibrillation, s: significant, ns: not significant, n: number of analyzed patients.

**Online Resource 4: Baseline characteristics of groups a and b**

| <b>Patient characteristics</b>              | <b>Group a</b> | <b>Group b</b> | <b>p-value</b> |
|---------------------------------------------|----------------|----------------|----------------|
| Patients (n)                                | 49             | 42             |                |
| Male gender                                 | 29 (59 %)      | 30 (71 %)      | 0.27           |
| Age (years)                                 | 65.59 ± 1.28   | 63.71 ± 1.78   | 0.38           |
| Body mass index (kg/m <sup>2</sup> )        | 26.36 ± 0.70   | 28.86 ± 0.76   | 0.02           |
| Left atrial size (mm)                       | 40.35 ± 0.61   | 40.21 ± 0.60   | 0.88           |
| LV ejection fraction                        |                |                |                |
| ≥ 55 %                                      | 40 (82 %)      | 37 (88 %)      | 0.56           |
| 45-54 %                                     | 8 (16 %)       | 4 (10 %)       | 0.37           |
| 30-44 %                                     | 1 (2 %)        | 1 (2 %)        | 1.00           |
| AF duration (years)                         | 4.91 ± 0.68    | 5.18 (1.00)    | 0.82           |
| EHRA                                        | 2.59 ± 0.08    | 2.48 ± 0.09    | 0.33           |
| NYHA                                        | 1.26 ± 0.05    | 1.36 ± 0.07    | 0.25           |
| Hypertension                                | 36 (74 %)      | 36 (86 %)      | 0.20           |
| Diabetes mellitus                           | 5 (10 %)       | 7 (17 %)       | 0.56           |
| Dyslipidemia                                | 24 (49 %)      | 20 (48 %)      | 1.00           |
| Coronary artery disease                     | 17 (35 %)      | 14 (33 %)      | 1.00           |
| History of stroke                           | 3 (6 %)        | 5 (12 %)       | 0.46           |
| CHA <sub>2</sub> DS <sub>2</sub> Vasc-Score | 2.29 ± 0.19    | 2.41 ± 0.23    | 0.69           |
| Antiarrhythmic medication                   |                |                |                |
| Propafenone                                 | 2 (4 %)        | 0 (0 %)        | 0.50           |
| Flecainide                                  | 4 (8 %)        | 4 (10 %)       | 1.00           |
| Beta blocker                                | 41 (84 %)      | 33 (79 %)      | 0.60           |
| Amiodarone                                  | 2 (4 %)        | 3 (7 %)        | 0.66           |
| Digitalis                                   | 1 (2 %)        | 1 (2 %)        | 1.00           |

AF: Atrial fibrillation; EHRA: European Heart Rhythm Classification, Group a: patients with pre-interventional sinus bradycardia < 60 beats/min.; Group b patients with faster heart rate (≥ 60 beats/min); LV: left ventricular, NYHA: New York Heart Association Functional Classification

**Online Resource 5:** Procedural parameters of groups a and b

| <b>Parameter</b>                       | <b>Group a</b> | <b>Group b</b> | <b>P-value</b> |
|----------------------------------------|----------------|----------------|----------------|
| HR baseline (min <sup>-1</sup> )       | 53.22 ± 0.48   | 67.43 ± 1.04   | < 0.001        |
| HR 1 day post PVI (min <sup>-1</sup> ) | 66.76 ± 1.34   | 73.07 ± 1.03   | < 0.001        |
| Free of recurrence                     | 36 (73 %)      | 33 (79 %)      | 0.63           |
| Procedure time (min)                   | 81.82 ± 2.20   | 88.71 ± 2.89   | 0.06           |
| Radiation dose (Gy x cm <sup>2</sup> ) | 8.46 ± 0.65    | 12.57 ± 0.99   | < 0.001        |
| Total ablation duration (min)          | 16.18 ± 0.72   | 17.5 ± 1.19    | 0.33           |
| Ablation duration per vein (min)       | 4.19 ± 0.21    | 4.35 ± 0.30    | 0.64           |
| Ablation duration LSPV (min)           | 4.48 ± 0.36    | 4.58 ± 0.33    | 0.83           |
| Ablation duration LIPV (min)           | 4.48 ± 0.44    | 4.49 ± 0.59    | 1.00           |
| Ablation duration RSPV (min)           | 3.97 ± 0.28    | 4.88 ± 0.46    | 0.08           |
| Ablation duration RIPV (min)           | 3.38 ± 0.20    | 3.53 ± 0.20    | 0.59           |
| Time per freeze (min)                  | 3.13 ± 0.18    | 3.18 ± 0.12    | 0.84           |

Group a: patients with pre-interventional sinus bradycardia < 60 beats/min.; Group b patients with faster heart rate ( ≥ 60 beats/min); HR: heart rate, LIPV: left inferior pulmonary vein, LSPV: left superior pulmonary vein, min: minute, PVI: pulmonary vein isolation, RIPV: right inferior pulmonary vein, RSPV: right superior pulmonary vein

**Online Resource 6:** Baseline characteristics of high rate response group and low rate response group

| <b>Patient characteristics</b>              | <b>High rate response group</b> | <b>Low rate response group</b> | <b>P-value</b> |
|---------------------------------------------|---------------------------------|--------------------------------|----------------|
| Patients (n)                                | 36                              | 55                             |                |
| Male gender                                 | 23 (64 %)                       | 36 (65 %)                      | 1.00           |
| Age (years)                                 | 63.36 ± 1.58                    | 65.62 ± 1.43                   | 0.30           |
| Body mass index (kg/m <sup>2</sup> )        | 27.32 ± 0.82                    | 27.65 ± 0.67                   | 0.76           |
| Left atrial size (mm)                       | 39.69 ± 0.79                    | 40.67 ± 0.49                   | 0.27           |
| LV ejection fraction                        |                                 |                                |                |
| ≥ 55 %                                      | 31 (86 %)                       | 46 (84 %)                      | 1.00           |
| 45-54 %                                     | 5 (14 %)                        | 7 (13 %)                       | 1.00           |
| 30-44 %                                     | 0 (0 %)                         | 2 (1 %)                        | 0.52           |
| AF duration (years)                         | 5.27 ± 0.83                     | 4.88 ± 0.81                    | 0.75           |
| EHRA                                        | 2.58 ± 0.09                     | 2.51 ± 0.08                    | 0.54           |
| NYHA                                        | 1.33 ± 0.07                     | 1.28 ± 0.06                    | 0.57           |
| Hypertension                                | 26 (72 %)                       | 46 (84 %)                      | 0.20           |
| Diabetes mellitus                           | 4 (11 %)                        | 8 (15 %)                       | 0.76           |
| Dyslipidemia                                | 16 (44 %)                       | 28 (51 %)                      | 0.67           |
| Coronary artery disease                     | 11 (31 %)                       | 20 (36 %)                      | 0.65           |
| History of stroke                           | 3 (1 %)                         | 5 (1 %)                        | 1.00           |
| CHA <sub>2</sub> DS <sub>2</sub> Vasc-Score | 2.03 ± 0.21                     | 2.55 ± 0.20                    | 0.08           |
| Antiarrhythmic medication                   |                                 |                                |                |
| Propafenone                                 | 2 (5 %)                         | 0 (0 %)                        | 0.15           |
| Flecainide                                  | 4 (11 %)                        | 4 (7 %)                        | 0.71           |
| Beta blocker                                | 28 (78 %)                       | 46 (84 %)                      | 0.58           |
| Amiodarone                                  | 1 (3 %)                         | 4 (7 %)                        | 0.64           |
| Digitalis                                   | 1 (3 %)                         | 1 (2 %)                        | 1.00           |

AF: Atrial fibrillation, EHRA: European Heart Rhythm Classification, LV: left ventricular, NYHA: New York Heart Association Functional Classification

**Online Resource 7:** Procedural parameters of high rate response and low rate response group

| <b>Parameter</b>                       | <b>High rate response group</b> | <b>Low rate response group</b> | <b>P-value</b> |
|----------------------------------------|---------------------------------|--------------------------------|----------------|
| HR baseline (min <sup>-1</sup> )       | 53.97 ± 0.74                    | 63.58 ± 1.20                   | < 0.001        |
| HR 1 day post PVI (min <sup>-1</sup> ) | 72.33 ± 1.28                    | 67.93 ± 1.23                   | < 0.05         |
| Free of recurrence                     | 28 (78 %)                       | 41 (75 %)                      | 0.81           |
| Procedure time (min)                   | 82.56 ± 2.88                    | 86.60 ± 2.34                   | 0.28           |
| Radiation dose (Gy x cm <sup>2</sup> ) | 9.78 ± 0.87                     | 10.74 ± 0.84                   | 0.44           |
| Total ablation duration (min)          | 18.15 ± 1.32                    | 15.90 ± 0.68                   | 0.10           |
| Ablation duration per vein (min)       | 4.68 ± 0.36                     | 4.00 ± 0.17                    | 0.06           |
| Ablation duration LSPV (min)           | 4.42 ± 0.46                     | 4.55 ± 0.28                    | 0.81           |
| Ablation duration LIPV (min)           | 5.48 ± 0.84                     | 3.87 ± 0.23                    | < 0.05         |
| Ablation duration RSPV (min)           | 4.76 ± 0.46                     | 4.23 ± 0.32                    | 0.33           |
| Ablation duration RIPV (min)           | 3.61 ± 0.28                     | 3.31 ± 0.15                    | 0.31           |
| Time per freeze (min)                  | 3.26 ± 0.25                     | 3.09 ± 0.09                    | 0.47           |

HR: heart rate, LIPV: left inferior pulmonary vein, LSPV: left superior pulmonary vein, min: minute, PVI: pulmonary vein isolation, RIPV: right inferior pulmonary vein, RSPV: right superior pulmonary vein



**Online Resource 8: Baseline characteristics of groups c and d**

| <b>Patient characteristics</b>              | <b>Group c</b> | <b>Group d</b> | <b>P-value</b> |
|---------------------------------------------|----------------|----------------|----------------|
| Patients (n)                                | 11             | 80             |                |
| Male gender                                 | 5 (50 %)       | 54 (68 %)      | 0.19           |
| Age (years)                                 | 71.36 ± 1.47   | 63.81 ± 1.16   | 0.02           |
| Body mass index (kg/m <sup>2</sup> )        | 23.18 ± 0.71   | 28.18 ± 0.56   | 0.001          |
| Left atrial size (mm)                       | 40.00 ± 1.05   | 40.33 ± 0.47   | 0.81           |
| LV ejection fraction                        |                |                |                |
| ≥ 55 %                                      | 8 (73 %)       | 69 (86 %)      | 0.37           |
| 45-54 %                                     | 3 (27 %)       | 9 (11 %)       | 0.16           |
| 30-44 %                                     | 0 (0 %)        | 2 (3 %)        | 1.00           |
| AF duration (years)                         | 4.20 ± 1.12    | 5.08 ± 0.65    | 0.83           |
| EHRA                                        | 2.64 ± 0.20    | 2.53 ± 0.06    | 0.54           |
| NYHA                                        | 1.32 ± 0.12    | 1.30 ± 0.05    | 0.89           |
| Hypertension                                | 8 (73 %)       | 64 (80 %)      | 0.69           |
| Diabetes mellitus                           | 1 (9 %)        | 11 (14 %)      | 1.00           |
| Dyslipidemia                                | 5 (46 %)       | 39 (49 %)      | 1.00           |
| Coronary artery disease                     | 4 (36 %)       | 27 (34 %)      | 1.00           |
| History of stroke                           | 1 (9 %)        | 7 (9 %)        | 1.00           |
| CHA <sub>2</sub> DS <sub>2</sub> Vasc-Score | 2.91 ± 0.37    | 2.26 ± 0.16    | 0.15           |
| Antiarrhythmic medication                   |                |                |                |
| Propafenone                                 | 0 (0 %)        | 2 (3 %)        | 1.00           |
| Flecainide                                  | 0 (0 %)        | 8 (10 %)       | 0.59           |
| Beta blocker                                | 9 (82 %)       | 65 (81 %)      | 1.00           |
| Amiodarone                                  | 2 (18 %)       | 3 (4 %)        | 0.11           |
| Digitalis                                   | 0 (0 %)        | 2 (3 %)        | 1.00           |

EHRA: European Heart Rhythm Classification, Group c: patients with post-interventional sinus bradycardia < 60 beats/min.; Group d patients with faster post-interventional heart rate (≥ 60 beats/min); AF: Atrial fibrillation, LV: left ventricular, NYHA: New York Heart Association Functional Classification

**Online Resource 9:** Procedural parameters of groups c and d

| <b>Parameter</b>                       | <b>Group c</b> | <b>Group d</b> | <b>P-value</b> |
|----------------------------------------|----------------|----------------|----------------|
| HR baseline (min <sup>-1</sup> )       | 53.45 ± 2.29   | 60.65 ± 0.96   | 0.01           |
| HR 1 day post PVI (min <sup>-1</sup> ) | 54.27 ± 1.05   | 71.79 ± 0.78   | < 0.001        |
| Free of recurrence                     | 4 (36 %)       | 65 (81 %)      | < 0.01         |
| Procedure time (min)                   | 82.36 ± 5.11   | 85.36 ± 1.95   | 0.59           |
| Radiation dose (Gy x cm <sup>2</sup> ) | 5.55 ± 0.51    | 11.02 ± 0.66   | < 0.01         |
| Total ablation duration (min)          | 15.57 ± 0.73   | 16.94 ± 0.76   | 0.54           |
| Ablation duration per vein (min)       | 3.92 ± 0.18    | 4.30 ± 0.20    | 0.69           |
| Ablation duration LSPV (min)           | 4.79 ± 0.61    | 4.49 ± 0.27    | 0.48           |
| Ablation duration LIPV (min)           | 3.96 ± 0.56    | 4.56 ± 0.41    | 0.58           |
| Ablation duration RSPV (min)           | 4.13 ± 0.93    | 4.50 ± 0.27    | 0.67           |
| Ablation duration RIPV (min)           | 2.93 ± 0.06    | 3.61 ± 0.17    | 0.17           |
| Time per freeze (min)                  | 2.93 ± 0.05    | 3.19 ± 0.13    | 0.46           |

Group c: patients with post-interventional sinus bradycardia < 60 beats/min.; Group d patients with faster post-interventional heart rate ( ≥ 60 beats/min); HR: heart rate, LIPV: left inferior pulmonary vein, LSPV: left superior pulmonary vein, min: minute, PVI: pulmonary vein isolation, RIPV: right inferior pulmonary vein, RSPV: right superior pulmonary vein

**Online Resource 10:** Antiarrhythmic medication in 75 patients post cryo-PVI subjected to follow-up heart rate analysis evaluated by Holter recording

**Antiarrhythmic medication**

---

|              |           |
|--------------|-----------|
| Propafenone  | 2 (2.7 %) |
| Flecainide   | 7 (9.3 %) |
| Beta blocker | 60 (80 %) |
| Amiodarone   | 3 (4 %)   |
| Digitalis    | 1 (1.3 %) |

---

**Online Resource 11:** Antiarrhythmic medication in 33 patients post cryo-PVI subjected to follow-up heart rate analysis evaluated by 12-lead ECG at rest

**Antiarrhythmic medication**

---

|              |             |
|--------------|-------------|
| Propafenone  | 0 (0 %)     |
| Flecainide   | 1 (0.03 %)  |
| Beta blocker | 19 (57.5 %) |
| Amiodarone   | 1 (0.03 %)  |
| Digitalis    | 0 (0 %)     |

---

**Online Resource 12:** Intraprocedural PQ intervals

| <b>Time point</b>                    | <b>Absolute changes (ms)</b> | <b>P-value</b> |
|--------------------------------------|------------------------------|----------------|
| post vs. prior cryo-ablation of LSPV | 1.31 ± 1.71                  | > 0.05         |
| post vs. prior cryo-ablation of LIPV | 0.80 ± 1.31                  | > 0.05         |
| post vs. prior cryo-ablation of RSPV | 0.80 ± 0.96                  | > 0.05         |
| post vs. prior cryo-ablation of RIPV | 1.19 ± 0.65                  | > 0.05         |
| Day after PVI vs. day before PVI     | 1.26 ± 1.35                  | > 0.05         |

LIPV: left inferior pulmonary vein, LSPV: left superior pulmonary vein, PVI: pulmonary vein isolation, RIPV: right inferior pulmonary vein, RSPV: right superior pulmonary vein

**Online Resource 13:** PQ intervals at one year follow-up

| <b>Time point</b>                  | <b>Absolute changes (ms)</b> | <b>P-value</b> |
|------------------------------------|------------------------------|----------------|
| Day after PVI vs. day before PVI   | 4.38 ± 5.53                  | > 0.05         |
| 1 year post PVI vs. day before PVI | 3.05 ± 4.69                  | > 0.05         |
| 1 year post PVI vs. day after PVI  | 1.33 ± 5.22                  | > 0.05         |

PVI: Pulmonary vein isolation
